# Supplementary material for: On the mechanism of electrochemical ammonia synthesis on the Ru catalyst
Source: Royal Society of Chemistry journal article supplement (doi:10.1039/c5cp07363d), 2016-01-01
Supplement: c5cp07363d1.pdf [file c5cp07363d1.pdf]

# Supplementary Information for “On the Mechanism of Electrochemical Ammonia Synthesis on the Ru Catalyst”

Seoin Back<sup>a</sup> and Yousung Jung<sup>a,\*</sup>

<sup>a</sup>Graduate School of EEWS, Korea Advanced Institute of Science and Technology (KAIST), 291

Daehakro, Daejeon 305-701, Korea

**Table S1.** Correction terms (zero-point energy, enthalpic temperature, entropy corrections) of adsorbates used to convert electronic energies into free energies. Displacement of adsorbate atoms is limited to  $\pm 0.01$  Å and temperature is set to 298.15 K.

| Adsorbates                     | ZPE (eV) | $\int C_p dT$ | -TS    | ZPE + $\int C_p dT$ - TS |
|--------------------------------|----------|---------------|--------|--------------------------|
| *N <sub>2</sub> H <sub>2</sub> | 0.78     | 0.08          | -0.16  | -0.16                    |
| *N <sub>2</sub> H              | 0.48     | 0.07          | -0.13  | -0.13                    |
| *N <sub>2</sub>                | 0.20     | 0.08          | -0.18  | -0.18                    |
| *NH <sub>2</sub>               | 0.69     | 0.05          | -0.09  | -0.09                    |
| *NHNH                          | 0.79     | 0.08          | -0.15  | -0.15                    |
| *NH                            | 0.379    | 0.028         | -0.039 | -0.039                   |
| *N                             | 0.093    | 0.018         | -0.026 | -0.026                   |
| *NH <sub>2</sub> NH            | 1.11     | 0.08          | -0.15  | -0.15                    |
| *NH <sub>2</sub> NH            | 1.46     | 0.062         | -0.103 | -0.103                   |
| *H                             | 0.16     | 0.01          | -0.02  | -0.02                    |

**Table S2.** Correction terms (zero-point energy, enthalpic temperature, entropy corrections) of gas-phase molecules used to convert electronic energies into free energies. Partial pressure and temperature are set to 101325 Pa and 298.15 K, respectively.

| Adsorbates                    | ZPE (eV) | $\int C_p dT$ | $-TS$ | $ZPE + \int C_p dT - TS$ |
|-------------------------------|----------|---------------|-------|--------------------------|
| H <sub>2</sub>                | 0.26     | 0.09          | -0.40 | -0.06                    |
| N <sub>2</sub>                | 0.15     | 0.09          | -0.59 | -0.36                    |
| NH <sub>3</sub>               | 0.97     | 0.11          | -0.60 | 0.48                     |
| N <sub>2</sub> H <sub>2</sub> | 0.76     | 0.10          | -0.68 | 0.19                     |
| N <sub>2</sub> H <sub>4</sub> | 1.37     | 0.11          | -0.71 | 0.77                     |

**Figure S1.** Comparison of (A) the B5-type site and (B) the supercell used in the present study. The current supercell contains the B5-type active site of the conventional Haber-Bosch process as well as the edge sites.

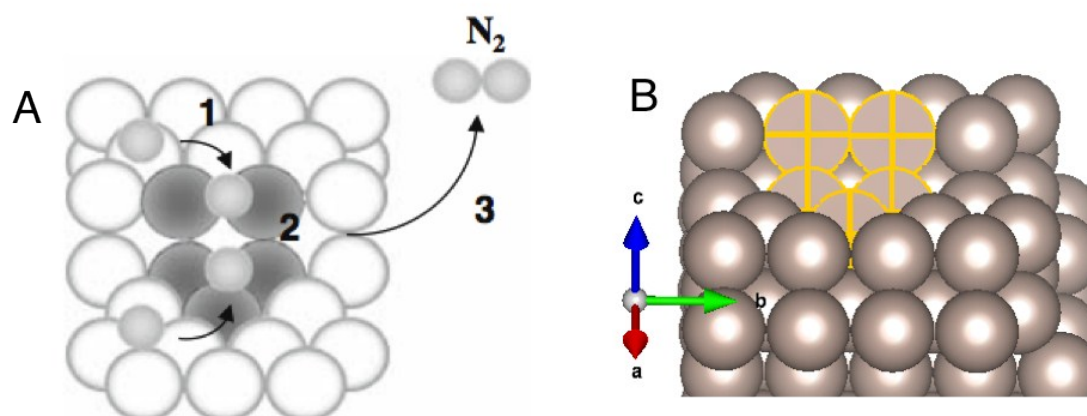

(A) B5-type site (Top Catal (2009) 52:758–764), (B) a supercell used in our work (repeated by 2 times in x-axis)
